# Supplementary material for: Using phenotypic data from the Electronic Health Record (EHR) to predict discharge
Source: PubMed Central journal article supplement (PMC10334536; doi:10.1186/s12877-023-04147-y), 2023-07-11
Supplement: 12877_2023_4147_MOESM2_ESM.pdf [file 12877_2023_4147_MOESM2_ESM.pdf]

## Additional File 2: Histogram & Density of Patient Active Medication Counts

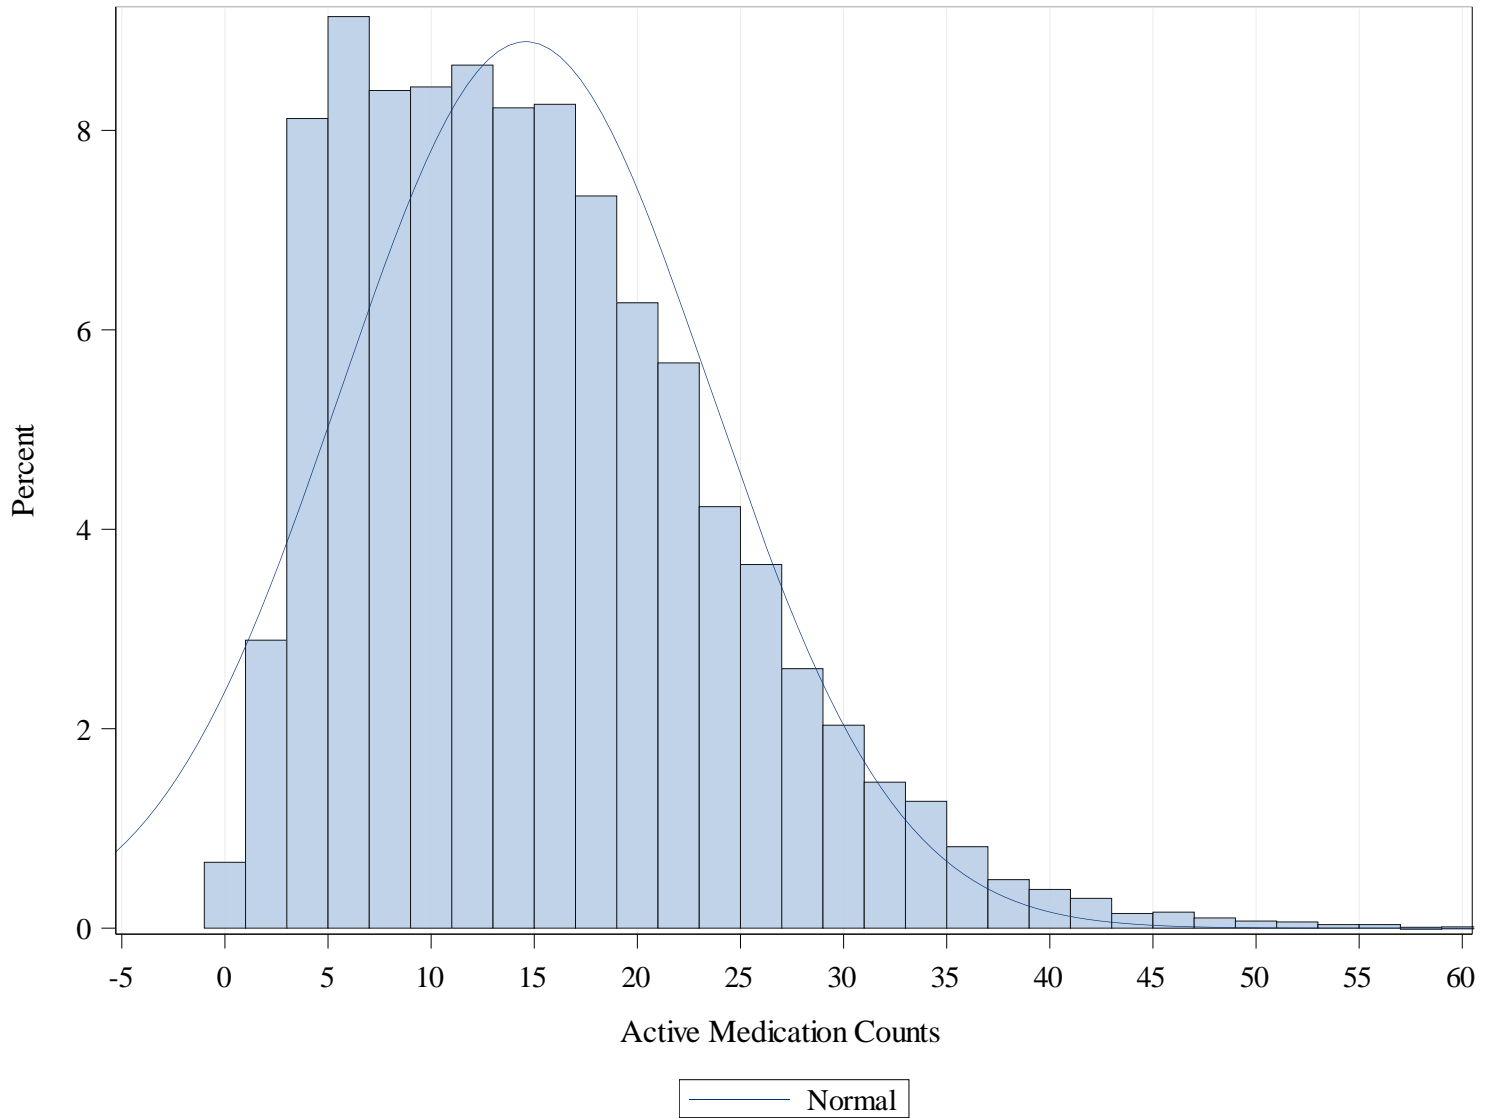

**Additional File 2:** A histogram plot showing the distribution of medication counts in the derivation cohort
